# Supplementary material for: Focal alterations of the callosal area III in primary lateral sclerosis: An MRI planimetry and texture analysis
Source: PubMed Central journal article supplement — Neuroimage Clin. 2020 Feb 21;26:102223. doi: 10.1016/j.nicl.2020.102223 (PMC7049663; doi:10.1016/j.nicl.2020.102223), 2020-02-21
Supplement: mmc2.pdf [file mmc2.pdf]

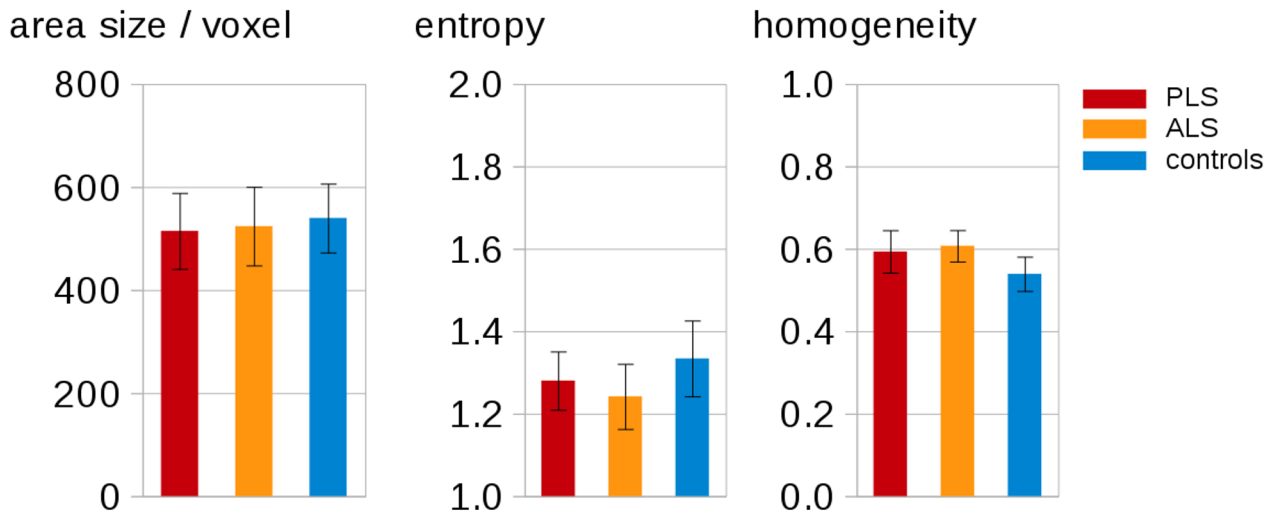

**Supplementary Figure 2:** Area sizes and texture results for the global CC in 67 patients with PLS, 85 patients with ALS, and 82 healthy controls at the group level.
