# Supplementary material for: Focal alterations of the callosal area III in primary lateral sclerosis: An MRI planimetry and texture analysis
Source: PubMed Central journal article supplement — Neuroimage Clin. 2020 Feb 21;26:102223. doi: 10.1016/j.nicl.2020.102223 (PMC7049663; doi:10.1016/j.nicl.2020.102223), 2020-02-21
Supplement: mmc3.pdf [file mmc3.pdf]

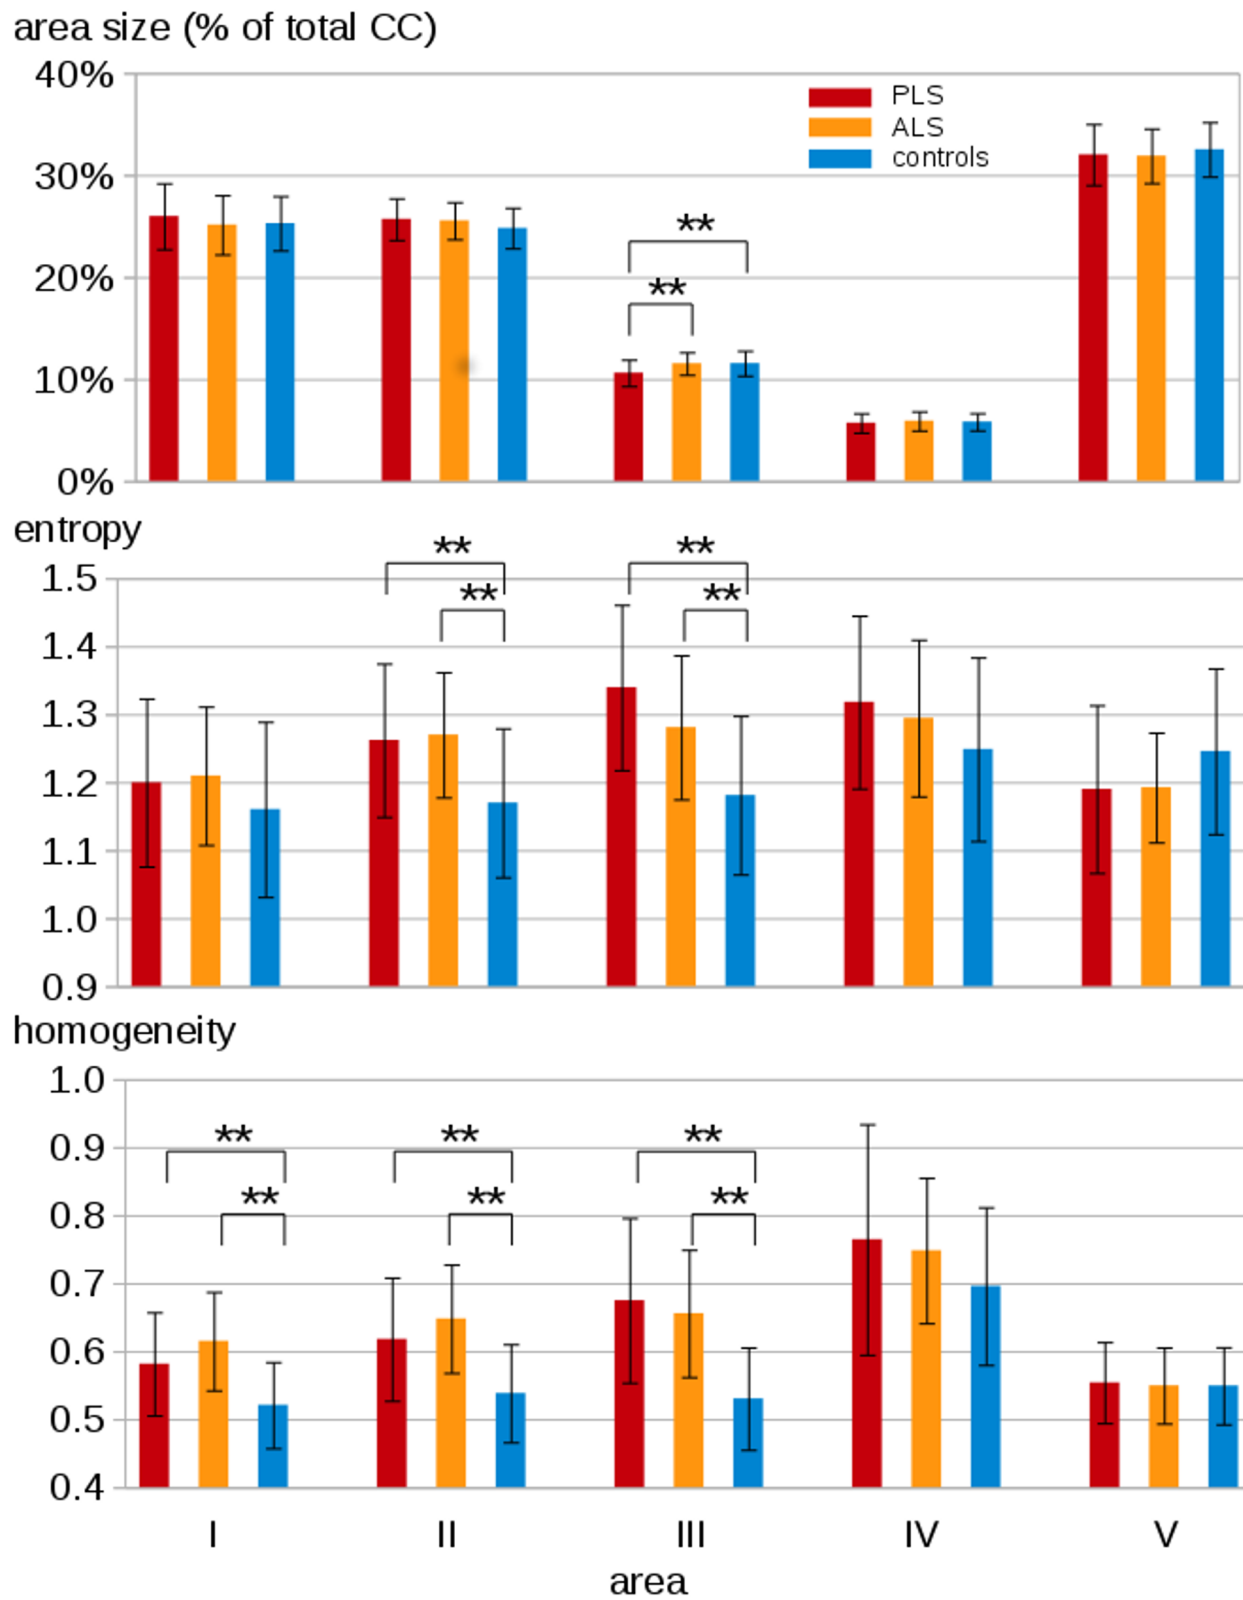

**Supplementary Figure 3:** Area sizes and texture results of the five CC areas (in percent of total midsagittal CC plane) in 67 patients with PLS, 85 patients with ALS, and 82 healthy controls at the group level. \*\*  $p < 0.001$ .
